# Supplementary material for: Antibacterial Activity of Visible Light-Activated TiO2 Thin Films with Low Level of Fe Doping
Source: Hindawi journal article supplement (doi:10.1155/2019/5819805), 2019-11-25
Supplement: f1 [file 5819805.f1.docx]

**Support information**

**Antibacterial activity of visible light activated TiO2 thin films with low level of Fe doping**

Dan Meng, Xiuhua Liu, Yun Xie, Yang Du, Yong Yang, Chao Xiao*

Institute of Nuclear Physics and Chemistry, China Academy of Engineering Physics,

Mianyang, 621900, P. R. China

*Corresponding author: Dr. Chao Xiao

E-mail: [xiaochao@caep.cn](mailto:xiaochao@caep.cn); Tel: +86-816-2484-262; Fax: +86-816-2484-200

**Fig. S1** Thickness of TiO2 films with films with different coating layers

**Fig. S2** X-ray diffraction patterns of 2 at. % of Fe-doped TiO2 at different

calcined temperature

**Fig. S3** Statistical results of particle size in bare TiO2 film (a) and 0.1 at. % Fe-doped TiO2 films (b)

**Fig. S4** 3D AFM images of TiO2 films with different Fe-doping amount

**Experimental section:** colony counting method

Counting colony counter can be used for plate colony counting. The counting method is described as below:

1. Select the average number of colonies between 30 and 300. If there is only one count of dilution in this area, the total number of bacteria is the product that the counting number multiplies by the dilution factor; if there is two dilution counts in this area, the total number of bacteria is determined by the ratio of colony counts of two dilutions. If the ratio is less than 2, the average of the two counts is taken as the total number of bacteria. If it is approximately or equal to 2, the colony count of the less dilutive count is the total number of bacteria;
2. When all counts are greater than 300, the total number of bacteria is the product that the bacterial count of the highest dilution multiply its dilution factor; When all counts are less than 30, the total number of colonies is contrary to the above calculation method; when all counts were outside the 30~300 area, the total number of bacteria is the product that the closest value to 30 or 300 multiplies the dilution ratio;
3. If there is no colony growth on all dilution plates, the count is zero;
4. When all plated are densely colonized, count the number of colonies on each plate by selecting any plate and the total number of bacteria is the product that the colonies count multiplies the dilution factor;

After counting the total number of bacteria on all plates, add up the counts on three plates with the same degree of dilution, divide by the number of plates and multiply by the dilution factor under same dilution, so that the value is the total number of bacteria in 1ml of sample.
